# Supplementary material for: Three-Locus Sequence Identification and Differential Tebuconazole Sensitivity Suggest Novel Fusarium equiseti Haplotype from Trinidad
Source: PubMed Central journal article supplement (PMC7157627; doi:10.3390/pathogens9030175), 2020-03-01
Supplement: pathogens-09-00175-s001.pdf [file pathogens-09-00175-s001.pdf]

**Supplementary data.**

**Table S1 (a). Summary statistics for percentage growth inhibition data for each MLST group**

|          | MLST 11 | MLST 15 | MLST 16 | MLST 26 |
|----------|---------|---------|---------|---------|
| <i>N</i> | 4       | 6       | 29      | 17      |
| MEAN     | 100.00  | 59.51   | 50.85   | 80.23   |
| SD       | 0.00    | 3.10    | 18.17   | 6.95    |
| SE MEAN  | 0.00    | 1.27    | 3.37    | 1.69    |
| MINIMUM  | 100.00  | 55.00   | 3.85    | 66.07   |
| MAXIMUM  | 100.00  | 61.91   | 74.58   | 100.00  |

SD – Standard deviation

SE – Standard error of the mean

**Table S1 (b). One-way ANOVA for arcsine transformed % growth inhibition for all MLST groups**

| SOURCE  | DF | SS    | MS    | F      | <i>P</i> |
|---------|----|-------|-------|--------|----------|
| BETWEEN | 3  | 4.696 | 1.565 | 48.630 | 0.000    |
| WITHIN  | 52 | 1.674 | 0.032 |        |          |
| TOTAL   | 55 | 6.370 |       |        |          |

DF – Degrees of freedom

SS – Sum of squares

MS – Mean sum of squares

F – *F* statistic

*P* – Significance level at 0.05

**Table S1 (c). One-way ANOVA for arcsine transformed % growth inhibition for MLST 11 and MLST 15**

| SOURCE  | DF | SS    | MS    | F        | <i>P</i> |
|---------|----|-------|-------|----------|----------|
| BETWEEN | 1  | 2.089 | 2.089 | 2282.320 | 0.000    |
| WITHIN  | 8  | 0.007 | 0.001 |          |          |
| TOTAL   | 9  | 2.096 |       |          |          |

DF – Degrees of freedom

SS – Sum of squares

MS – Mean sum of squares

F – *F* statistic

*P* – Significance level at 0.05

**Table S1 (d). One-way ANOVA for arcsine transformed % growth inhibition for MLST 11 and MLST 16**

| SOURCE  | DF | SS    | MS    | F      | <i>P</i> |
|---------|----|-------|-------|--------|----------|
| BETWEEN | 1  | 3.704 | 3.704 | 97.740 | 0.000    |
| WITHIN  | 31 | 1.175 | 0.038 |        |          |
| TOTAL   | 32 | 4.879 |       |        |          |

DF – Degrees of freedom

SS – Sum of squares

MS – Mean sum of squares

F – *F* statistic

*P* – Significance level at 0.05

**Table S1 (e). One-way ANOVA for arcsine transformed % growth inhibition for MLST 11 and MLST 26**

| SOURCE  | DF | SS    | MS    | F      | <i>P</i> |
|---------|----|-------|-------|--------|----------|
| BETWEEN | 1  | 1.237 | 1.237 | 47.800 | 0.000    |
| WITHIN  | 19 | 0.492 | 0.026 |        |          |
| TOTAL   | 20 | 1.729 |       |        |          |

DF – Degrees of freedom

SS – Sum of squares

MS – Mean sum of squares

F – *F* statistic

*P* – Significance level at 0.05

**Table S2 (a). Summary statistics for EC50 data for each MLST group**

|         | MLST<br>11 | MLST<br>15 | MLST<br>16 | MLST<br>26 |
|---------|------------|------------|------------|------------|
| N       | 4          | 9          | 21         | 12         |
| MEAN    | 1.87       | 8.57       | 9.79       | 2.15       |
| SD      | 0.06       | 2.56       | 3.97       | 1.31       |
| SE MEAN | 0.03       | 0.85       | 0.87       | 0.38       |
| MINIMUM | 1.80       | 4.74       | 4.25       | 1.20       |
| MAXIMUM | 1.94       | 13.30      | 18.39      | 5.77       |

SD – Standard deviation

SE – Standard error of the mean

**Table S2 (b). Analysis of variance (ANOVA) of EC50 values for all MLST groups**

|         | DF | SS     | MS     | F     | <i>P</i> |
|---------|----|--------|--------|-------|----------|
| BETWEEN | 3  | 572.39 | 190.80 | 20.75 | 0.000    |
| WITHIN  | 42 | 386.11 | 9.19   |       |          |
| TOTAL   | 45 | 958.50 |        |       |          |

DF – Degrees of freedom

SS – Sum of squares

MS – Mean sum of squares

F – *F* statistic

*P* – Significance level at 0.05

**Table S2 (c). Tukey (HSD) comparison of mean EC50 values indicates where the EC50 values are significantly different according to MLST group**

| VARIABLE | MEAN   | GROUPS <sup>1</sup> |
|----------|--------|---------------------|
| MLST 16  | 9.7876 | I                   |
| MLST 15  | 8.57   | I                   |
| MLST 26  | 2.1467 | .. I                |
| MLST 11  | 1.8725 | .. I                |

<sup>1</sup> – LSD (T) comparison of mean EC50 values were identical to Tukey test.

**Table S2 (d). Analysis of variance (ANOVA) of EC50 values for MLST 11 and MLST 26**

|         | DF | SS      | MS      | F    | <i>P</i> |
|---------|----|---------|---------|------|----------|
| BETWEEN | 1  | 0.2255  | 0.2255  | 0.17 | 0.6879   |
| WITHIN  | 14 | 18.7691 | 1.34065 |      |          |
| TOTAL   | 15 | 18.9946 |         |      |          |

DF – Degrees of freedom

SS – Sum of squares

MS – Mean sum of squares

F – *F* statistic

*P* – Significance level at 0.05

**Table S2 (e). Analysis of variance (ANOVA) of EC50 values for MLST 15 and MLST 16**

|         | DF | SS      | MS      | F    | <i>P</i> |
|---------|----|---------|---------|------|----------|
| BETWEEN | 1  | 9.34036 | 9.34036 | 0.71 | 0.4059   |
| WITHIN  | 28 | 367.34  | 13.1193 |      |          |
| TOTAL   | 29 | 376.68  |         |      |          |

DF – Degrees of freedom

SS – Sum of squares

MS – Mean sum of squares

F – *F* statistic

*P* – Significance level at 0.05
